# Supplementary material for: The Pollen Donor Affects Seed Development, Taste, and Flavor Quality in ‘Hayward’ Kiwifruit
Source: MDPI journal article supplement (doi:10.3390/ijms24108876), 2023-05-17
Supplement: s1 [file s1]

## Supplementary Materials

**Table S1.** Sensory evaluation criteria.

| sensory characteristics        | Scoring criteria |                            |                 |                     |                                   |
|--------------------------------|------------------|----------------------------|-----------------|---------------------|-----------------------------------|
|                                | 0-2              | 3-4                        | 5-6             | 7-8                 | 9-10                              |
| Pulp Texture                   | Hard pulp        | Less juice and harder pulp | More refreshing | Juicy and crisp     | Juicy, fine texture and crispness |
| Aromatic scent                 | Bad aroma        | No aroma                   | Lighter aroma   | Stronger aroma      | Strong aroma                      |
| Flavor                         | Obvious odor     | Faint odor                 | lighter         | More sweet and sour | Sweet and sour                    |
| Whether seeds affect the taste | Severe effects   | Effects                    | Moderate        | slightly            | No effect                         |
